# Supplementary material for: Epidemiological and Genetic Characteristics of Clinical Carbapenem-Resistant Pseudomonas aeruginosa Strains in Guangdong Province, China
Source: PubMed Central journal article supplement (PMC10269565; doi:10.1128/spectrum.04261-22), 2023-04-20
Supplement: spectrum.04261-22-s0003.pdf [file spectrum.04261-22-s0003.pdf]

## Supplementary

### **Epidemiological and Genetic Characteristics of Clinical Carbapenem-Resistant *Pseudomonas aeruginosa* Strains in Guangdong Province, China**

Yonggang Zhao<sup>1,#</sup>, Dingqiang Chen<sup>2,#</sup>, Kaichao Chen<sup>3,#</sup>, Miaomiao Xie<sup>3</sup>, Jiubiao Guo<sup>4</sup>, Edward Wai Chi Chan<sup>3</sup>, Lu Xie<sup>5</sup>, Jingbo Wang<sup>4</sup>, Enqi Chen<sup>4</sup>, Sheng Chen<sup>3\*</sup>, Weijun Chen<sup>6\*</sup>, Lars Jelsbak<sup>1\*</sup>

Running title: Epidemiological characteristics of clinical CRPA

<sup>1</sup>Department of Biotechnology and Biomedicine, Technical University of Denmark, Denmark.

<sup>2</sup>Microbiome Medicine Center, Department of Laboratory Medicine, Zhujiang Hospital, Southern Medical University, Guangzhou Guangdong, 510282, China.

<sup>3</sup>Department of Infectious Diseases and Public Health, Jockey Club College of Veterinary Medicine and Life Sciences, City University of Hong Kong, Kowloon, Hong Kong.

<sup>4</sup>College of Pharmacy-Shenzhen Technology University. Shenzhen Guangdong, 518118, China.

<sup>5</sup>Research Center for Micro-Ecological Agent Engineering and Technology of Guangdong Province, Guangzhou Guangdong, 510640, China.

<sup>6</sup>BGI-Shenzhen, Shenzhen Guangdong, 518083, China.

# These authors contributed equally to this work.

#### **Corresponding author:**

Sheng Chen, City University of Hong Kong. Email: shechen@cityu.edu.hk.

Weijun Chen, BGI-Shenzhen. Email: chenwj@bgi.com.

Lars Jelsbak, Technical University of Denmark. Email: lj@bio.dtu.dk.

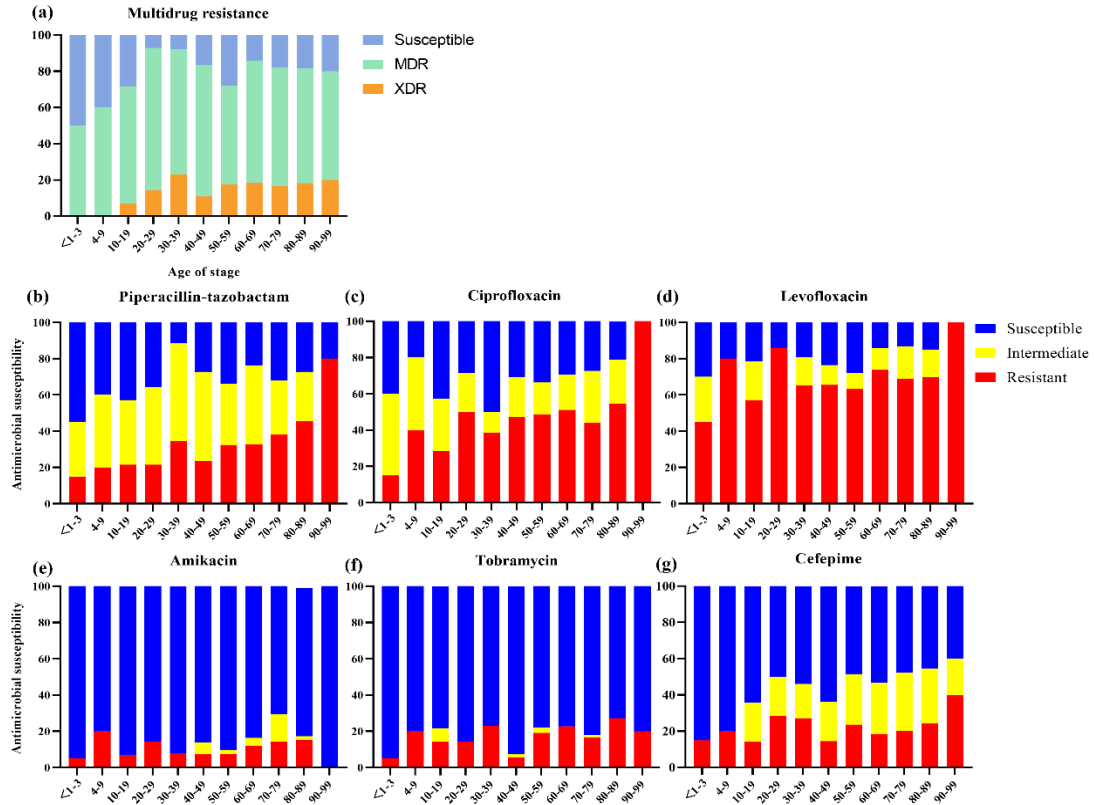

**Supplementary Figure S1. Correlation of patient ages and antimicrobial susceptibility in 416 clinical *P. aeruginosa* strains.** (a) Distribution of susceptible, MDR and XDR *P. aeruginosa* strains in patients of different ages. Susceptibility of piperacillin-tazobactam (b), ciprofloxacin (c), levofloxacin (d), amikacin (e), tobramycin (f) and cefepime (g) of the 416 *P. aeruginosa* strains from patients of different ages.

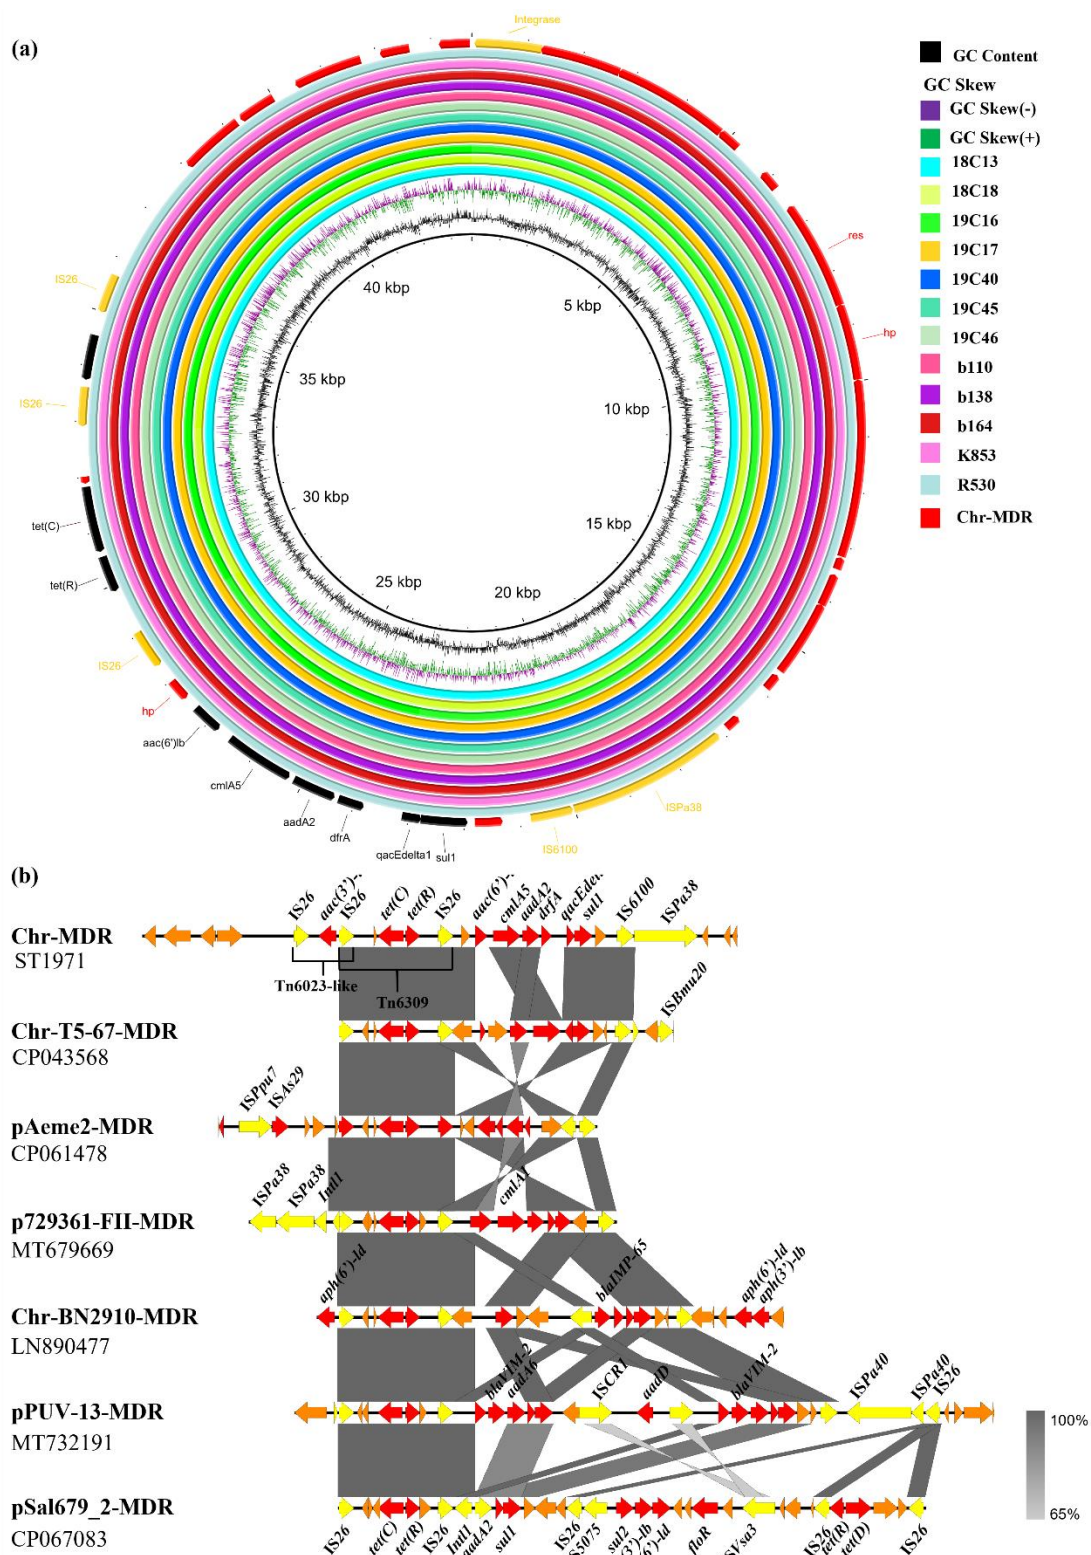

similar structures deposited in the NCBI database, including chromosomal MDR regions Chr-T5-67-MDR (CP043568) and Chr-BN2910 (LN890477) recovered from *Comamonas testosterone* and *Achromobacter xylosoxidans*, respectively; and MDR regions of plasmid pAeme2 (CP061478, *Aeromonas caviae*), plasmid p729361-FII (MT679669, *Leclercia sp*), plasmid pPUV-13 (MT732191, *Pseudomonas aeruginosa*) and pSal679\_2 (CP067083.1, *Salmonella enterica subsp*). Red, resistance gene; yellow, insertion sequence.

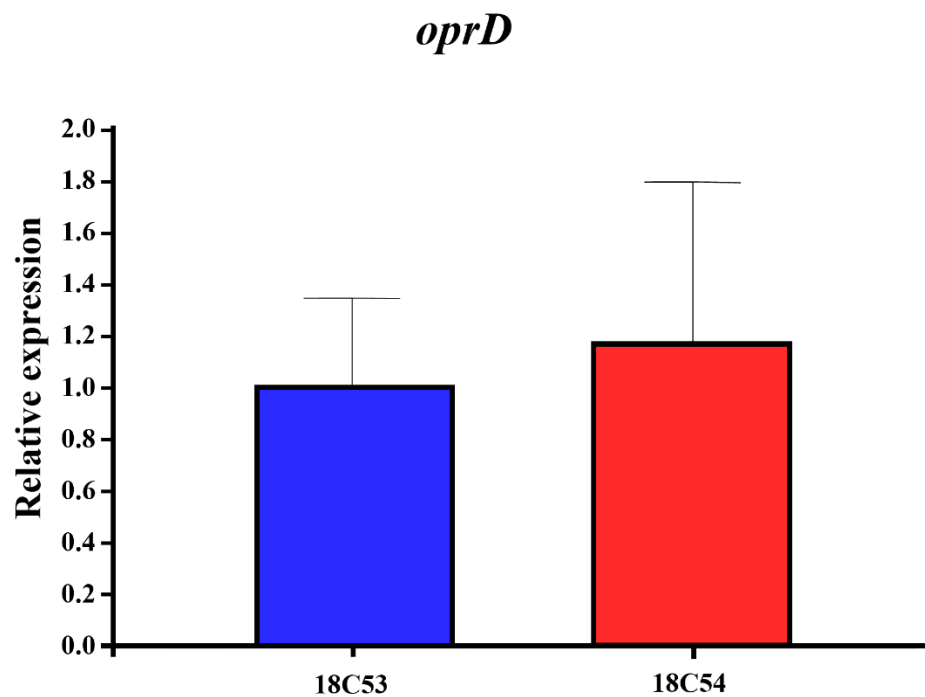

**Supplementary Figure S3. Relative expression levels of *oprD* gene in strains 18C53(IMP-resistant) and 18C54 (IMP- susceptible).** Slight expression differences with 1.2-fold were observed, the *rpls* gene were used as a housekeeper gene to normalize the expression levels of the target genes.
